# Supplementary material for: Hierarchical Cu pillar electrodes for electrochemical CO2 reduction to formic acid with low overpotential
Source: Royal Society of Chemistry journal article supplement (doi:10.1039/c5cp07964k), 2016-01-01
Supplement: c5cp07964k1.pdf [file c5cp07964k1.pdf]

## Electronic Supplementary Information

# Hierarchical Cu pillar electrode for electrochemical CO<sub>2</sub> reduction to formic acid with low overpotential

Jaehoon Chung,<sup>a</sup> Da Hye Won,<sup>a</sup> Jae Kang Koh,<sup>b</sup> Eun-Hee Kim,<sup>c</sup> and Seong Ihl Woo<sup>a,b\*</sup>

<sup>a</sup> *Department of Chemical and Biomolecular Engineering, Korea Advanced Institute of Science and Technology, Daejeon (34141), Republic of Korea.*

<sup>b</sup> *Graduate School of EEWS, Korea Advanced Institute of Science and Technology, Daejeon (34141), Republic of Korea.*

<sup>c</sup> *Protein structure research team, Korea Basic Science Institute, Cheongjoo (28119), Republic of Korea*

\* Corresponding author:

Tel:+82-42-350-3918; Fax: +82-42-350-8890; E-mail: siwoo@kaist.ac.kr

|                                         |               | <b>foil</b> | <b>Cu-2.5 h</b> | <b>Cu-5 h</b> |
|-----------------------------------------|---------------|-------------|-----------------|---------------|
| <b>Absolute intensity at each facet</b> | (111)         | 6893        | 6310            | 6005          |
|                                         | (200)         | 12917       | 2959            | 1641          |
|                                         | (220)         | 1022        | 718             | 647           |
| <b>Relative ratio</b>                   | (111) / (200) | 0.53        | 2.13            | 3.66          |
|                                         | (111) / (220) | 6.74        | 8.79            | 9.28          |

**Table. S1** Absolute intensity of XRD result at each facet and their relative ratio of (111) / (200) and (111) / (220) facet

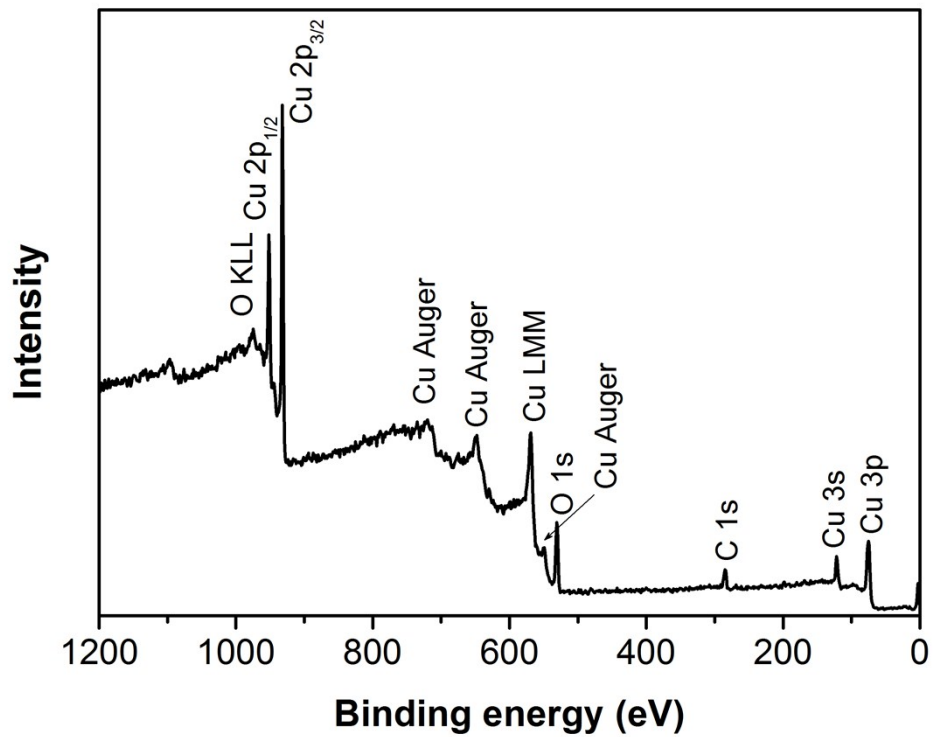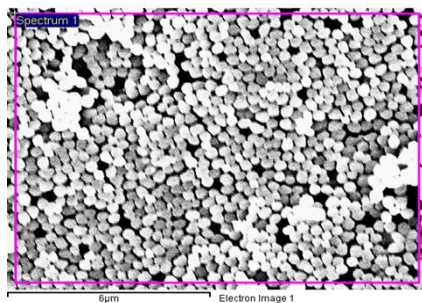

| Element | Weight% | Atomic% |
|---------|---------|---------|
| O K     | 1.13    | 4.33    |
| Cu L    | 98.87   | 95.67   |
| Totals  | 100.00  |         |

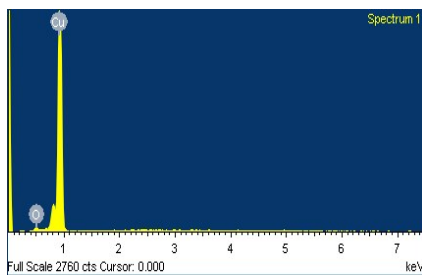

**Fig. S1** (a) Survey XPS and (b) EDS result of a Cu pillar electrode after cathodic electrode deposition

for 5 hours (Cu-5 h). Atomic ratio of Cu, O and C are 39 %, 31 % and 30 %, respectively.

| Voltage (V) | $j_{\text{tot}}$ (mA/cm <sup>2</sup> ) | Production rate (μmol/h) |       |       | Faradaic efficiency (%) |      |       |       |
|-------------|----------------------------------------|--------------------------|-------|-------|-------------------------|------|-------|-------|
|             |                                        | H <sub>2</sub>           | CO    | HCOOH | H <sub>2</sub>          | CO   | HCOOH | Total |
| <b>-0.3</b> | 3.01                                   | 2.25                     | 0     | 0.18  | 87.53                   | 0.00 | 6.95  | 93.78 |
| <b>-0.4</b> | 5.70                                   | 3.95                     | 0.005 | 0.79  | 80.40                   | 0.11 | 16.15 | 96.66 |
| <b>-0.5</b> | 9.78                                   | 6.4                      | 0.009 | 1.93  | 75.64                   | 0.21 | 22.85 | 98.70 |
| <b>-0.6</b> | 17.5                                   | 11                       | 0.086 | 3.76  | 72.59                   | 1.14 | 24.81 | 98.54 |
| <b>-0.7</b> | 25.8                                   | 15.9                     | 0.335 | 5.4   | 71.29                   | 3.01 | 24.21 | 98.51 |
| <b>-0.8</b> | 34.2                                   | 21                       | 0.558 | 5.95  | 71.06                   | 3.78 | 20.12 | 94.95 |
| <b>-0.9</b> | 41.9                                   | 28                       | 0.397 | 7.03  | 77.34                   | 2.20 | 19.41 | 98.95 |

**Table S2.** Summary of total current densities and faradaic efficiencies for all products at various potentials on Cu-2.5 h

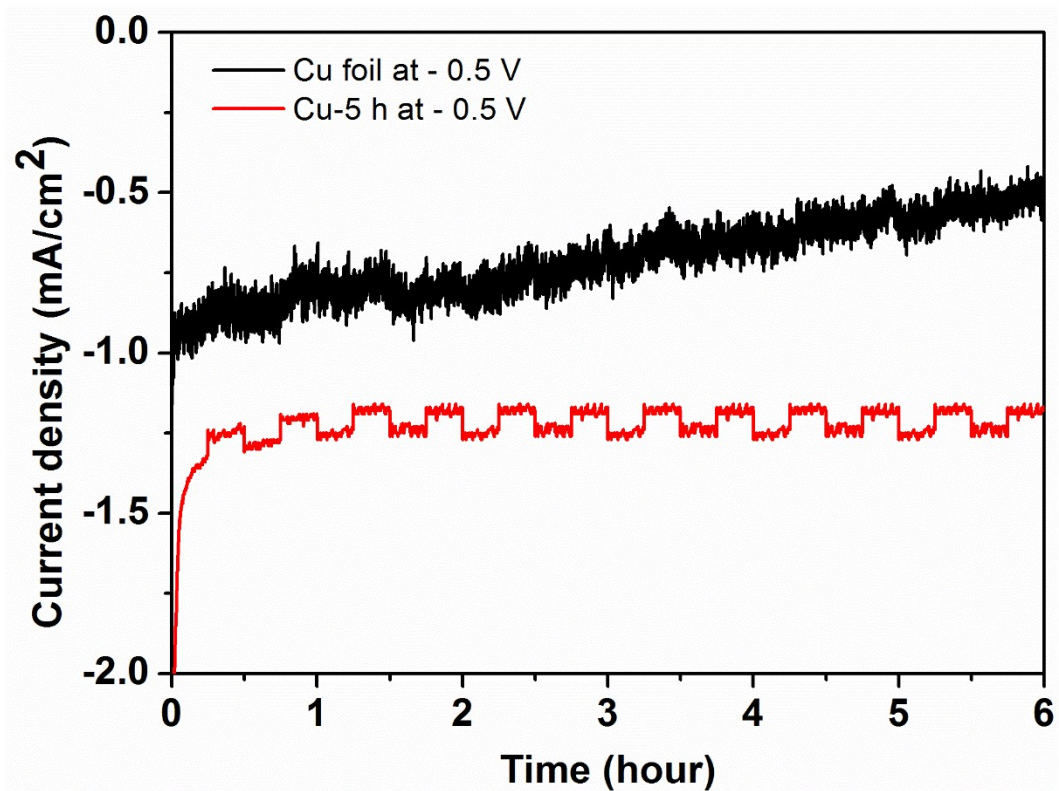

**Fig. S2** Chronoamperometry curve of Cu-5 h (red) and Cu foil (black) electrode for 6 hours at  $-0.5$  V in saturated  $0.1$  M  $\text{KHCO}_3$ .

| Applied Potential | Cu foil                |                  |                            | Cu-2.5 h               |                  |                            | Cu-5 h                 |                  |                            |
|-------------------|------------------------|------------------|----------------------------|------------------------|------------------|----------------------------|------------------------|------------------|----------------------------|
|                   | Electrolyte resistance | Ohmic resistance | Charge transfer resistance | Electrolyte resistance | Ohmic resistance | Charge transfer resistance | Electrolyte resistance | Ohmic resistance | Charge transfer resistance |
| - 0.4 V           | 48.35                  | 162.7            | 15350                      | 42.92                  | 112.8            | 373.4                      | 38.77                  | 82.74            | 486.6                      |
| - 0.5 V           | 50.38                  | 166.5            | 5065                       | 43.18                  | 111.5            | 203.1                      | 39.14                  | 83.58            | 186.7                      |
| - 0.6 V           | 48.84                  | 163.4            | 2542                       | 43.95                  | 110.9            | 114                        | 39.14                  | 83.02            | 96.08                      |
| - 0.7 V           | 43.07                  | 172.8            | 646.4                      | 40.35                  | 103.8            | 59.25                      | 41.96                  | 80.5             | 65.88                      |

**Table S3.** Summary of EIS measurement for all products at various applied potentials on Cu-5 h, Cu-2.5 h and Cu foil.

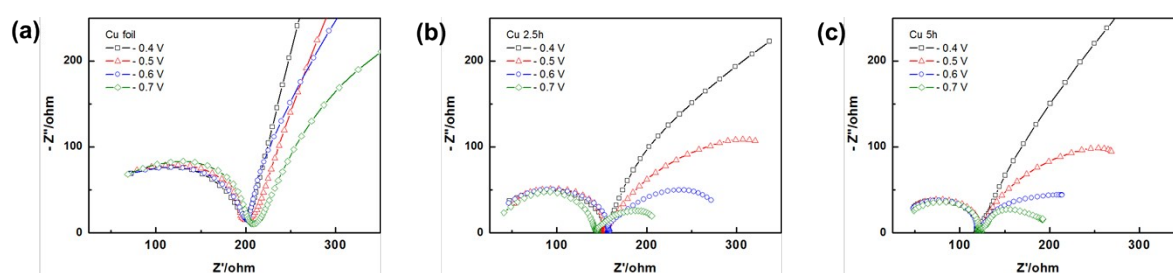

**Fig. S3** Result of EIS measurement of (a) Cu-5 h, (b) Cu-2.5 h and (c) Cu foil at various applied potential

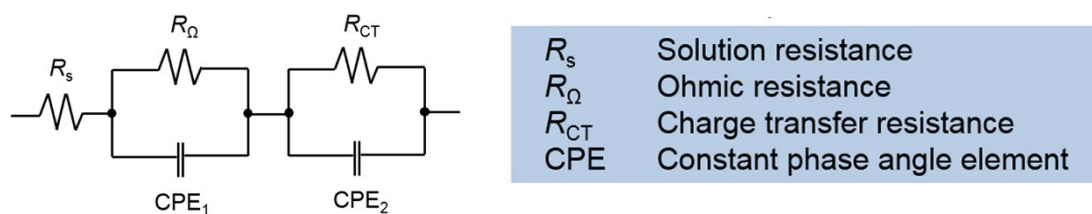

**Fig. S4** An equivalent circuit model and its parameters used for the EIS simulations
